# Supplementary material for: Depression of LncRNA DANCR alleviates tubular injury in diabetic nephropathy by regulating KLF5 through sponge miR-214-5p
Source: Springer Nature journal article supplement (doi:10.1186/s12882-024-03562-6), 2024-04-12

Supplementary material

KFL5

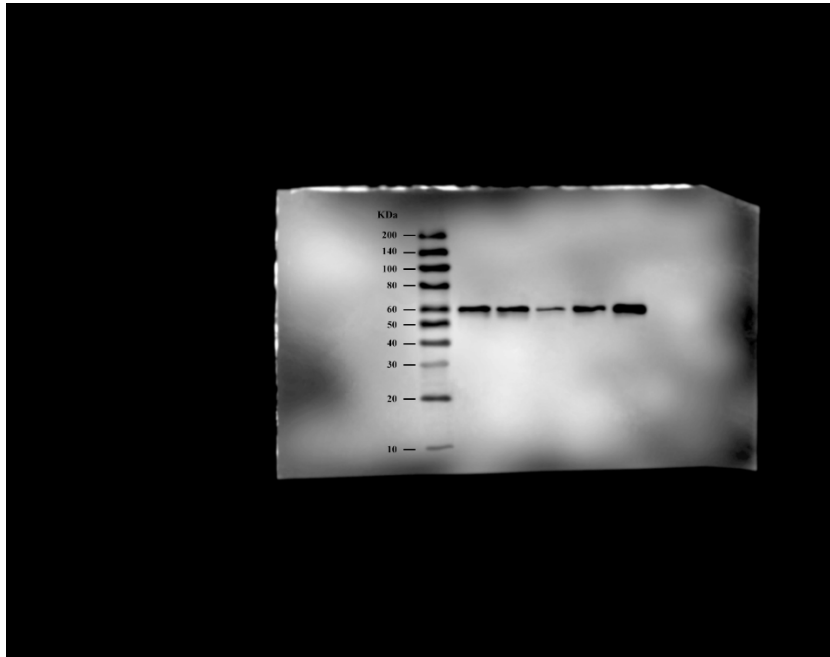

$\beta$ -actin

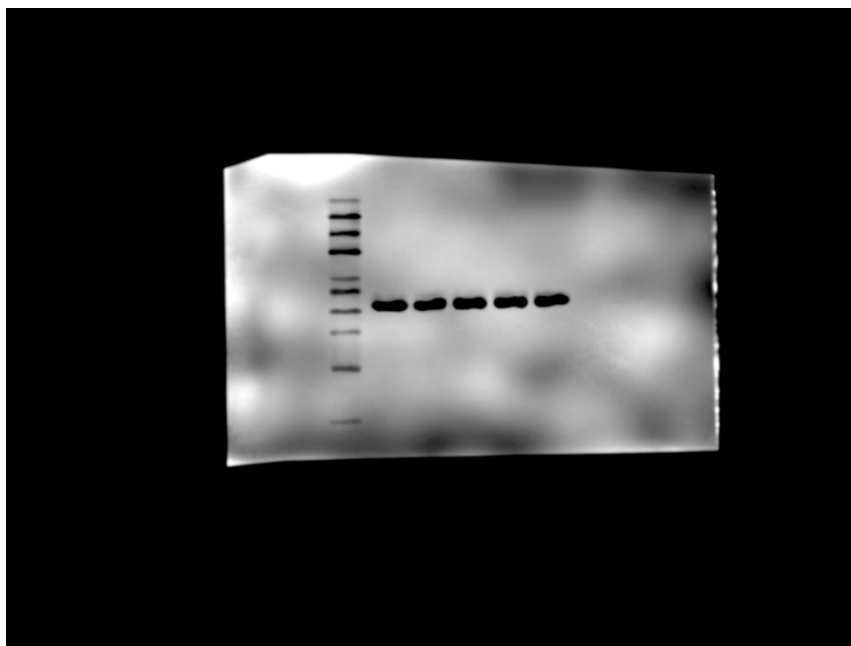

KFL5

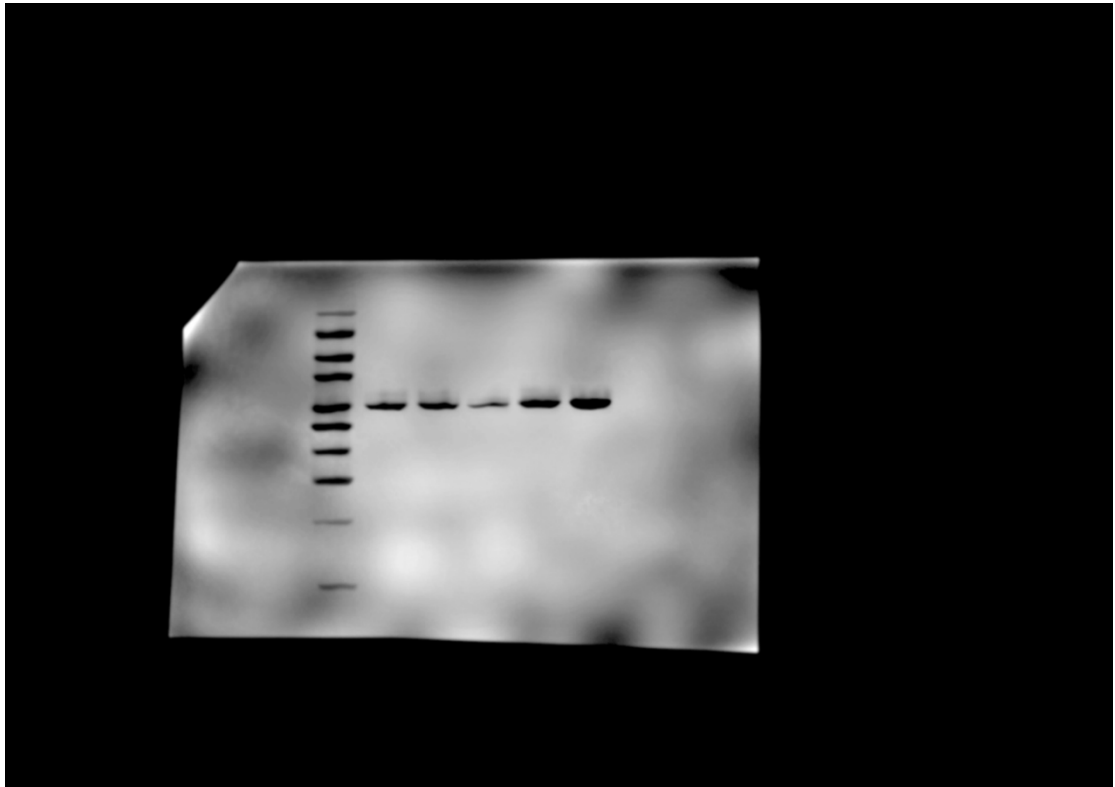

$\beta$ -actin

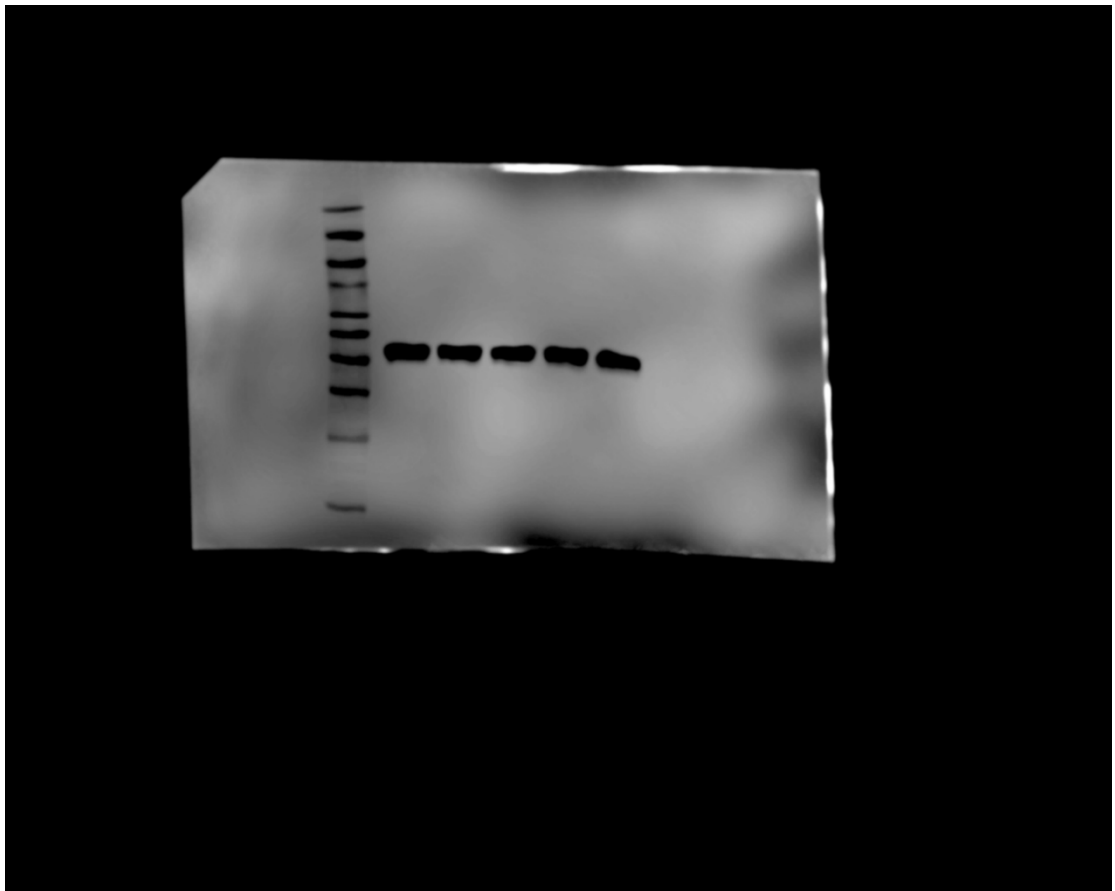

Supplement: MOESM1 [file 26972096]
